# Supplementary material for: Oncogenic YAP mediates changes in chromatin accessibility and activity that drive cell cycle gene expression and cell migration
Source: PubMed Central journal article supplement (PMC10201438; doi:10.1093/nar/gkad107), 2023-03-02
Supplement: gkad107_supplemental_file.pdf [file gkad107_supplemental_file.pdf]

## SUPPLEMENTAL MATERIAL

### SUPPLEMENTAL FIGURE AND TABLE LEGENDS

#### **Supplementary Figure S1: Subcellular localization of endogenous YAP and overexpressed YAP5SA in MCF10A cells**

A) and B) The localization of endogenous YAP (-dox) and of doxycycline-induced YAP5SA (+dox) was investigated by immunostaining (A) and cellular fractionation (B). Immunoblotting for GAPDH (cytoplasmic) and Histone 2B (nuclear), served as controls for the successful fractionation. Endogenous YAP was expressed at very low levels in the cytoplasm, while overexpressed YAP5SA was enriched in the nucleus

#### **Supplementary Figure S2: Motifs enriched in opened promoters**

Significantly enriched sequence motifs in promoter regions that become more accessible by YAP5SA ("opened promoters") as determined by the MEME-ChIP suit.

#### **Supplementary Figure S3: Motifs enriched in closed promoters**

Significantly enriched sequence motifs in promoter regions that become less accessible by YAP5SA ("closed promoters") as determined by the MEME-ChIP suit.

#### **Supplementary Figure S4: Motifs enriched in promoters of MMB target genes**

Significantly enriched sequence motifs in promoter regions of high confidence MMB-target genes as determined by the MEME-ChIP suit.

#### **Supplementary Figure S5: YAP5S does not increase chromatin accessibility at MMB-regulated promoters**

A) Line plots depicting chromatin accessibility (ATAC), nucleosome signal (NucleoATAC), and the levels of the indicated proteins by ChIPseq at the TSS of YAP-MMB target genes in MCF10A cells with (+) and without (-) expression of YAP5SA. B) Line plots depicting chromatin accessibility (ATAC), nucleosome signal (NucleoATAC), and the levels of the indicated proteins by ChIPseq at the TSS of genes with gained ATAC-peaks in their promoter with and without expression of YAP5SA. C) Genome browser tracks showing chromatin accessibility and YAP-binding to two *CDC20* enhancers (E1 and E2). Long-range interactions between the *CDC20* promoter and enhancers as determined by 4C-seq are indicated by arrows (Pattschull et al., 2019). D) Gene browser tracks of the *CDC20* TSS and enhancer regions depicting the indicating ChIPseq and ATACseq data before and after expression of YAP5SA.

#### **Supplementary Figure S6: Validation of doxycycline-inducible dCas9-KRAB**

A) Expression of Cas9-KRAB and YAP5SA in MCF10A cells before and after induction with doxycycline was analyzed by immunoblotting. Actin served as a control. B) Expression of Cas9-KRAB was analyzed by immunostaining with an HA-antibody. Nuclei were stained with Hoechst. +dox: cells were treated with doxycycline to induce the expression of Cas9-KRAB and YAP5SA.

#### **Supplementary Figure S7: Control precipitations with IgG for ChIP assays**

Results of control precipitations with IgG for the ChIP assays shown in Figure 3.

#### **Supplementary Figure S8: A role for CDK7 in YAP-mediated activation of MMB-target genes**

A) Immunoblotting of the indicated proteins in lysates of MDA-MB-231 cells treated as described in Figure 5B demonstrating that the CDK7 inhibitor THZ1 does not affect the levels of YAP. B) Nuclear lysates of MCF10A-YAP5SA cells treated with (+) or without (-) doxycycline were subjected to immunoprecipitation with CDK7 antibodies. Bound proteins were detected

by immunoblotting. XPD was used as positive control. Immunoprecipitations with nonspecific IgG served as a negative control. C) Example photos of proximity ligation assays (PLA) of the respective antibody controls from Figure 5D, IgG M-R (IgG Mouse- IgG Rabbit control). Scale bar: 10  $\mu$ m. D) Quantification of PLA shown in C. Shown is a single-cell analysis of one representative replicate (n=3). E) ChIP-qPCRs of CDK7 binding to the CDC20 locus before and after YAP5SA induction in MCF10A-Cas9-KRAB/ YAP5SA cells expressing either a control guide RNA or CDC20-enhancer specific guide RNAs. Shown is the fold-change of all biological replicates compared to the +dox condition. See also Figure 5F. Student's t-test. \* =  $p < 0.05$ , ns = not significant. F) ChIP-qPCRs of CDK7 binding to a control region (CR), the promoters of MMB target genes (KIF23, TOP2A and NCAPH) and DREAM target genes (RRM1 and CDC6). Precipitations with IgG served as a control. Mean and SDs of technical replicates of a representative experiment (n=3 biological replicates).

### **Supplementary Figure S9: YAP and p63 co-regulated genes involved in migration**

A) GO analysis of YAP and p63 co-regulated genes that were identified by integrating p63 ChIPseq and YAP5SA RNAseq data sets. The identified genes are involved in diverse biological processes including development and wound healing. B) Genome browser track of the *MINK1* locus, showing ChIP-seq and ATAC-seq data in control MCF10A cells, before (-) and after expression of YAP5SA (+). E: enhancer. C) MCF10A-YAP5SA and MCF10-YAP5SA- $\Delta$ Np63 cells were treated with doxycycline to either induce YAP5SA or simultaneously induce YAP5SA and  $\Delta$ Np63. Binding of  $\Delta$ Np63 to the indicated genomic regions was analyzed by ChIP-qPCRs. Control region (CR). Precipitations with IgG served as a control. Shown are the means and SDs of technical triplicates of a representative experiment (n=2 biological replicates).

**Supplementary Table 1:** Transcription factor motifs associated with regions with increased chromatin accessibility following expression of YAP5SA as determined by chromVAR.

**Supplementary Table 2:** Transcription factor motifs associated with regions with increased chromatin accessibility following expression of YAP5SA as determined by chromVAR.

**Supplementary Table 3:** List of oligonucleotide and siRNA sequences

**Supplementary Table 4:** List of antibodies used in this study

# Supplementary Figure S1

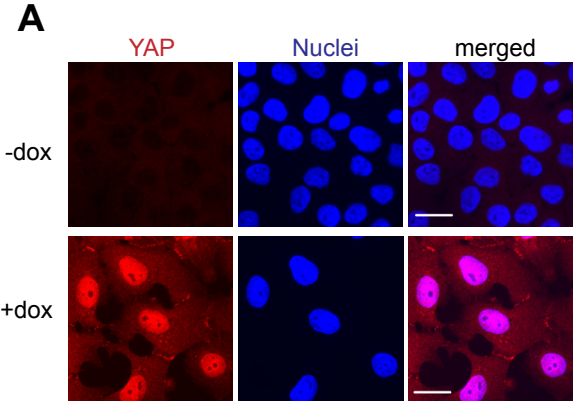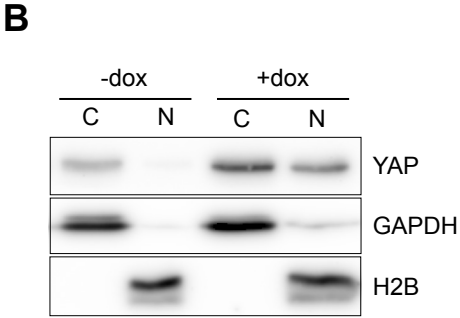

# Supplementary Figure S2

significant motifs in opened promoters (E-value  $\leq 0.05$ ) found by the programs MEME, STREME and CentriMo

| Motif                                                                              | Discovery/<br>Enrichment program | E-value  | known or<br>similar motifs                                                    |
|------------------------------------------------------------------------------------|----------------------------------|----------|-------------------------------------------------------------------------------|
| 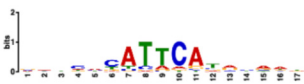   | MEME                             | 1.2e-132 | TEAD1_full_1<br>TEAD4_DBD<br>TEAD1_full_2                                     |
|    | MEME                             | 3.5e-055 | Atf3 (MA1988.1)<br>Jun (MA0489.2)<br>BNC2 (MA1928.1)                          |
|    | MEME                             | 2.7e-020 | ZNF384 (MA1125.1)<br>Mtf1_secondary (UP00097_2)<br>Zfp105_primary (UP00037_1) |
|    | CentriMo                         | 5.8e-011 | NFIX_full_1                                                                   |
|    | CentriMo                         | 5.4e-004 | Sox17_secondary (UP00014_2)                                                   |
|   | CentriMo                         | 2.6e-003 | RUNX3_DBD_2                                                                   |
|  | CentriMo                         | 2.9e-003 | ELK4 (MA0076.2)                                                               |
|  | CentriMo                         | 7.4e-003 | FOS::JUN (MA1126.1)                                                           |
|  | CentriMo                         | 8.5e-003 |                                                                               |
|  | CentriMo                         | 2.7e-002 | TFAP2B (MA0811.1)                                                             |
|  | CentriMo                         | 4.9e-002 | HSFY2_DBD_2                                                                   |

# Supplementary Figure S3

significant motifs in closed promoters (E-value  $\leq 0.05$ ) found by the programs MEME, STREME and CentriMo

| Motif                                                                               | Discovery/<br>Enrichment program | E-value  | known or<br>similar motifs                                                   |
|-------------------------------------------------------------------------------------|----------------------------------|----------|------------------------------------------------------------------------------|
|    | MEME                             | 1.1e-111 | ZNF93 (MA1721.1)<br>ZNF610 (MA1713.1)<br>EGR1 (MA0162.4)                     |
|    | MEME                             | 1.8e-032 | ZNF263 (MA0528.2)<br>PATZ1 (MA1961.1)<br>ZNF610 (MA1713.1)                   |
|    | CentriMo                         | 6.5e-027 | Atf3 (MA1988.1)<br>JUND (MA0491.2)<br>FOS::JUNB (MA1134.1)                   |
|    | MEME                             | 4.0e-021 | ZNF384 (MA1125.1)<br>Srf_secondary (UP00077_2)<br>Mtf1_secondary (UP00097_2) |
|    | CentriMo                         | 1.2e-018 | Tp53_DBD_3                                                                   |
|    | CentriMo                         | 3.1e-009 | Zic1::Zic2 (MA1628.1)                                                        |
|   | CentriMo                         | 4.3e-009 | Nrf1 (MA0506.2)                                                              |
|  | CentriMo                         | 2.6e-008 | CEBPG_full                                                                   |
|  | CentriMo                         | 4.7e-008 | SP1_DBD                                                                      |
|  | CentriMo                         | 1.1e-004 | TFAP2A_DBD_2                                                                 |
|  | CentriMo                         | 2.1e-004 | ZBTB14 (MA1650.1)                                                            |
|  | CentriMo                         | 6.7e-004 | ELK3 (MA0759.2)                                                              |
|  | CentriMo                         | 1.7e-003 | TFAP2A_DBD_6                                                                 |
|  | CentriMo                         | 2.1e-003 | Rfx4_primary (UP00056_1)                                                     |
|  | CentriMo                         | 3.1e-003 | E2F3_secondary (UP00003_2)                                                   |
|  | CentriMo                         | 3.5e-003 | TFDP1 (MA1122.1)                                                             |
|  | Streme                           | 8.0e-003 | TFAP4::FLI1 (MA1967.1)                                                       |

# Supplementary Figure S4

## MMB target genes

significant motifs (E-value  $\leq 0.05$ ) found by the programs MEME, STREME and CentriMo

| Motif                                                                               | Discovery/<br>Enrichment program | E-value  | known or<br>similar motifs                                 |
|-------------------------------------------------------------------------------------|----------------------------------|----------|------------------------------------------------------------|
|    | MEME                             | 1.5e-048 | SP2 (MA0516.3)<br>SP1 (MA0079.5)<br>SP4 (MA0685.2)         |
|    | MEME                             | 6.1e-022 | LIN54 (MA0619.1)                                           |
|    | MEME                             | 5.1e-012 | ZNF93 (MA1721.1)<br>ZNF740 (MA0753.2)<br>ZNF610 (MA1713.1) |
|    | MEME                             | 3.7e-010 | NFYA (MA0060.3)<br>NFYC (MA1644.1)<br>Hoxa13 (MA0650.3)    |
|    | CentriMo                         | 6.4e-008 | XBP1_DBD_1                                                 |
|  | CentriMo                         | 1.0e-003 | ELF3_DBD                                                   |



# Supplementary Figure S5

**A**

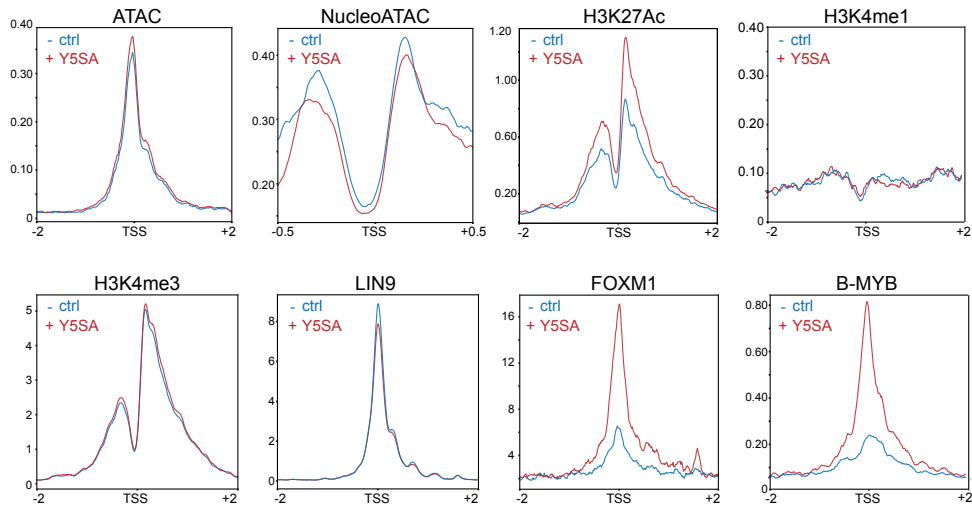

**B**

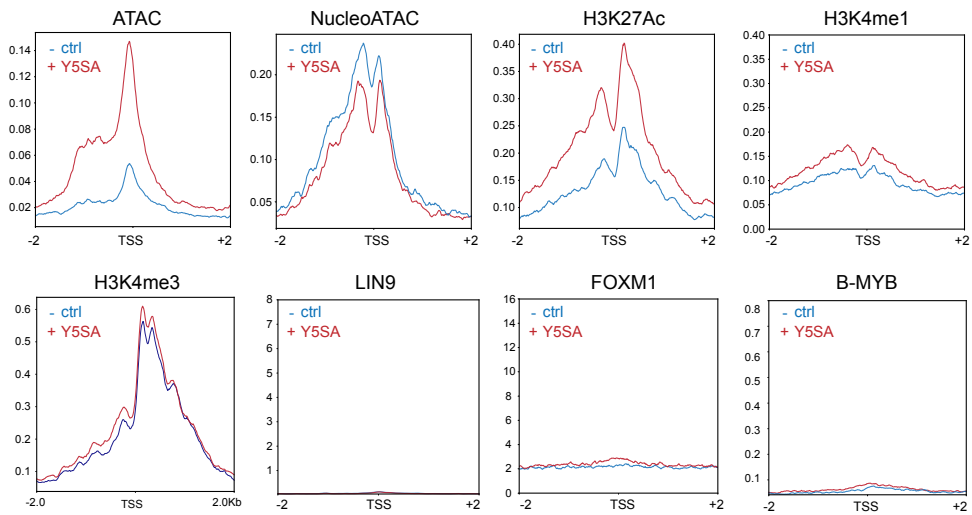

**C**

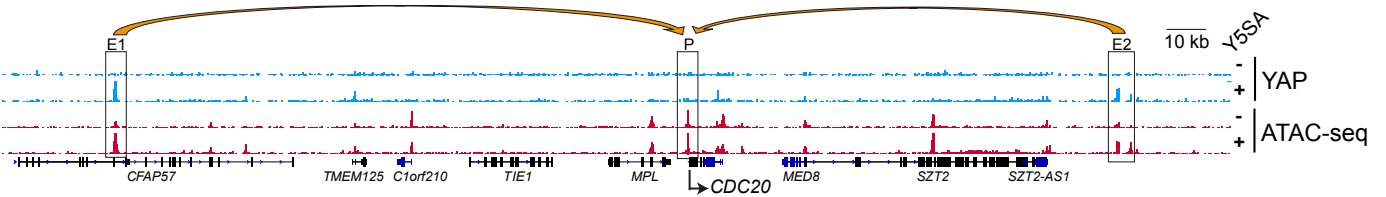

**D**

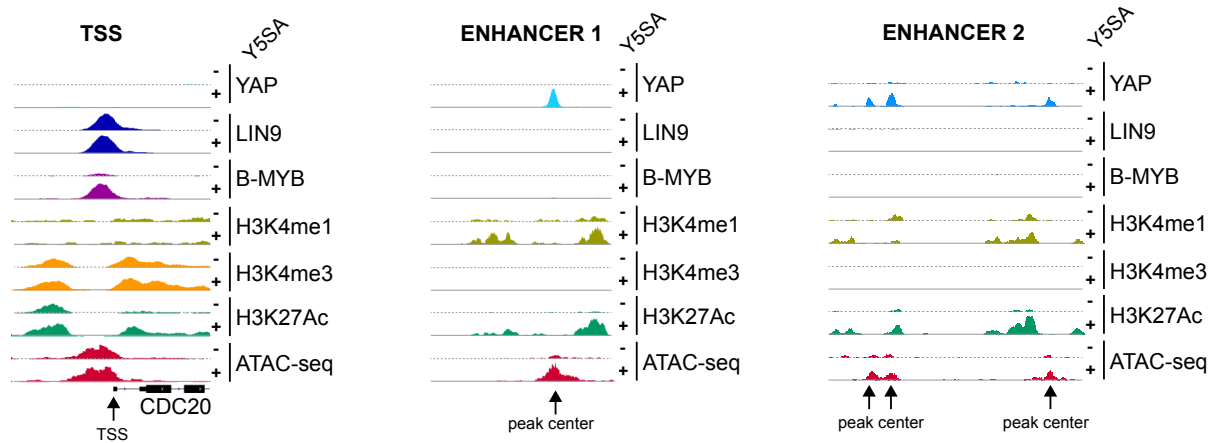

# Supplementary Figure S6

**A**

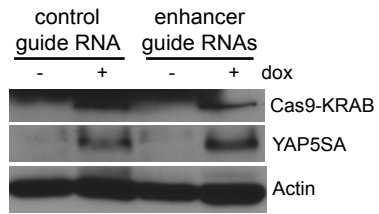

**B**

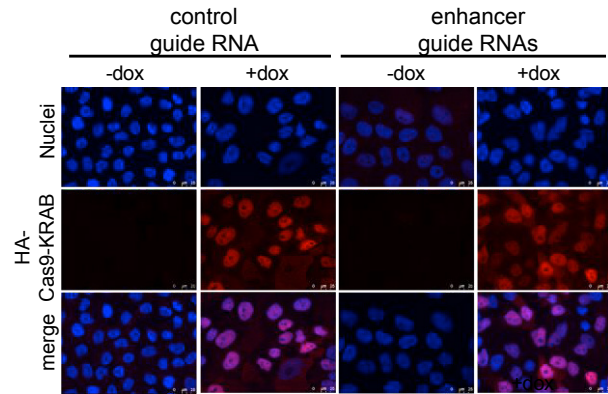

# Supplementary Figure S7

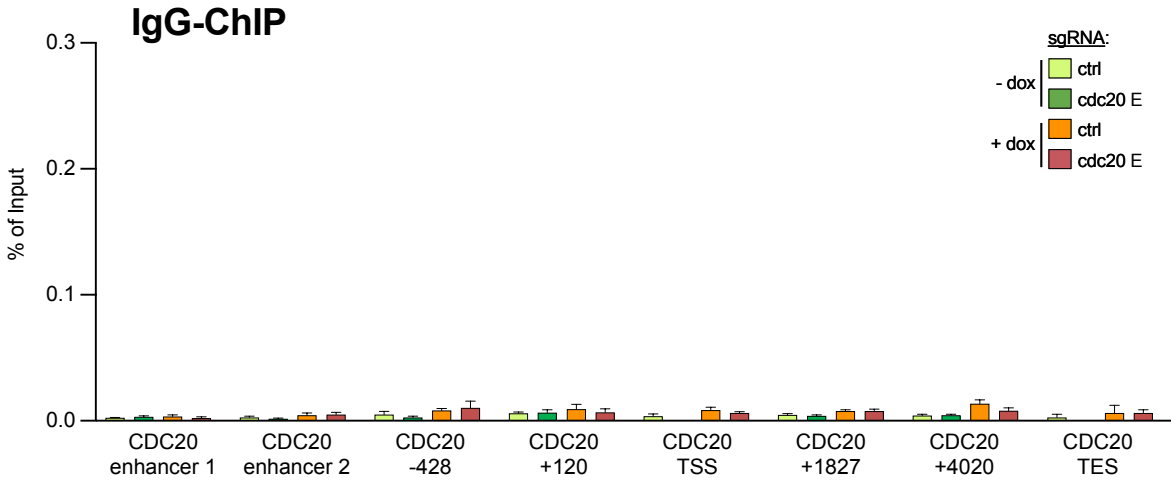

# Supplementary Figure S8

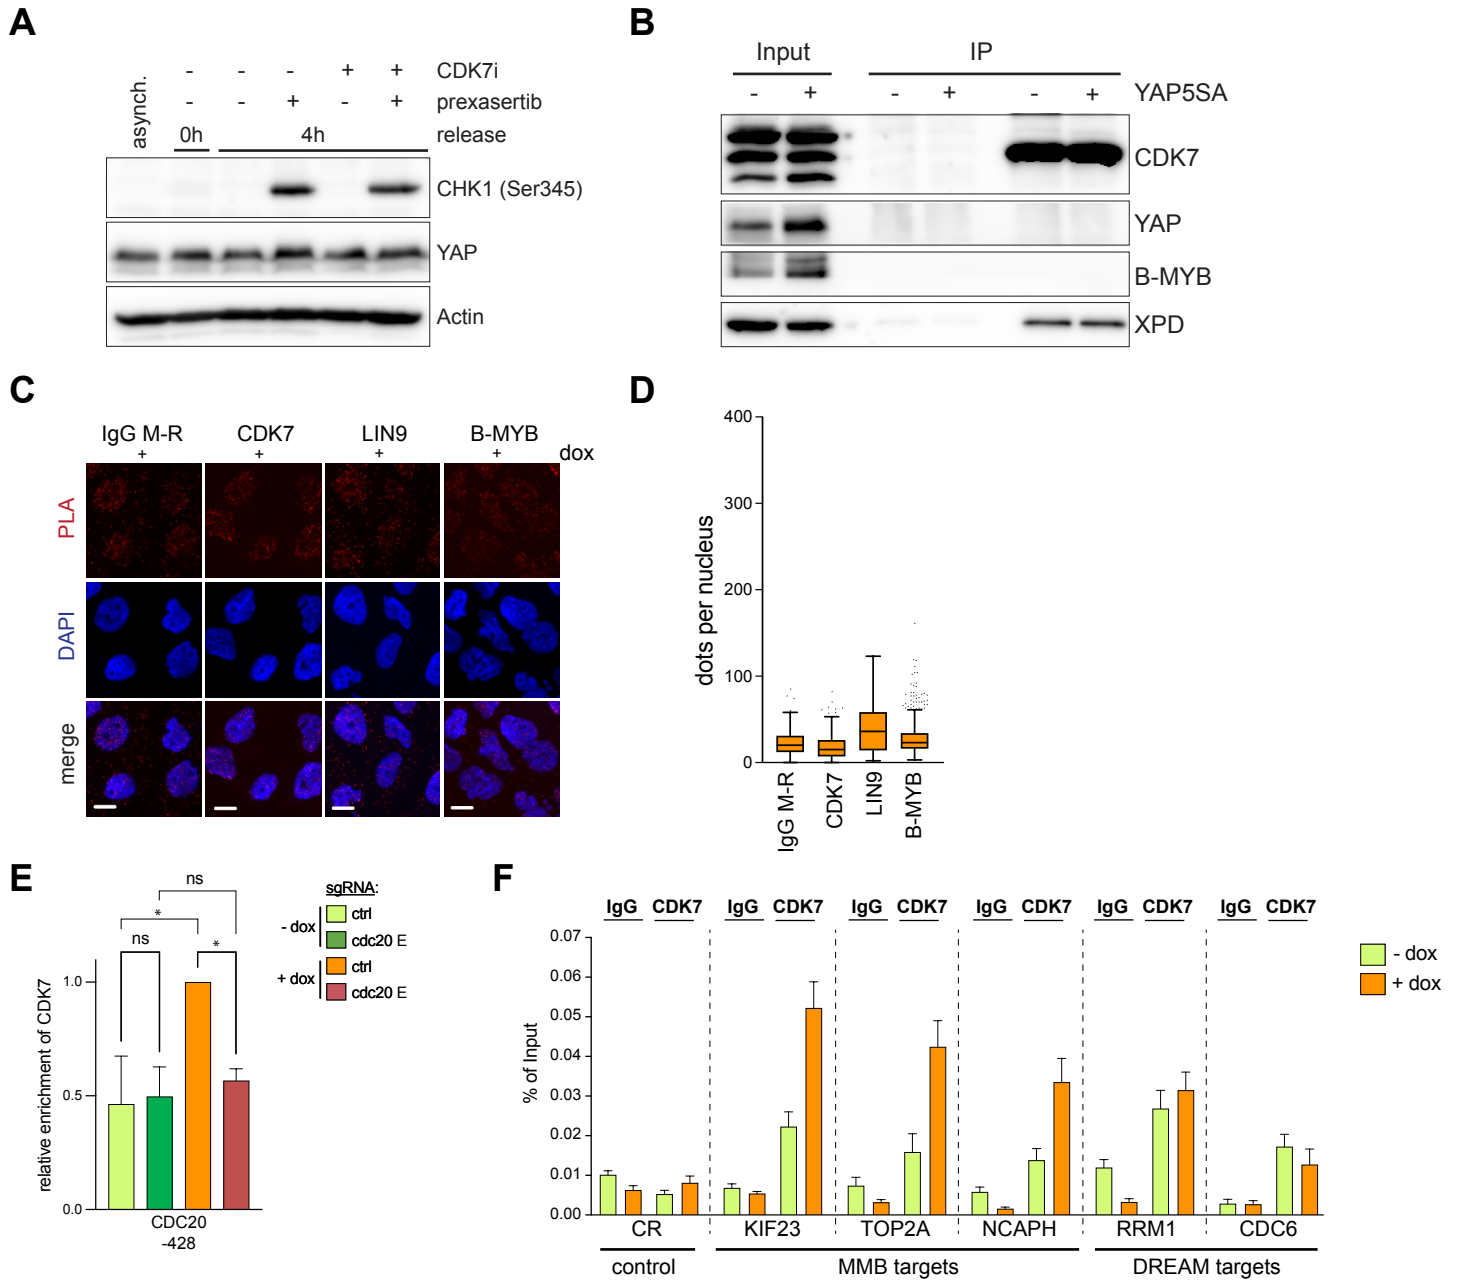

# Supplementary Figure S9

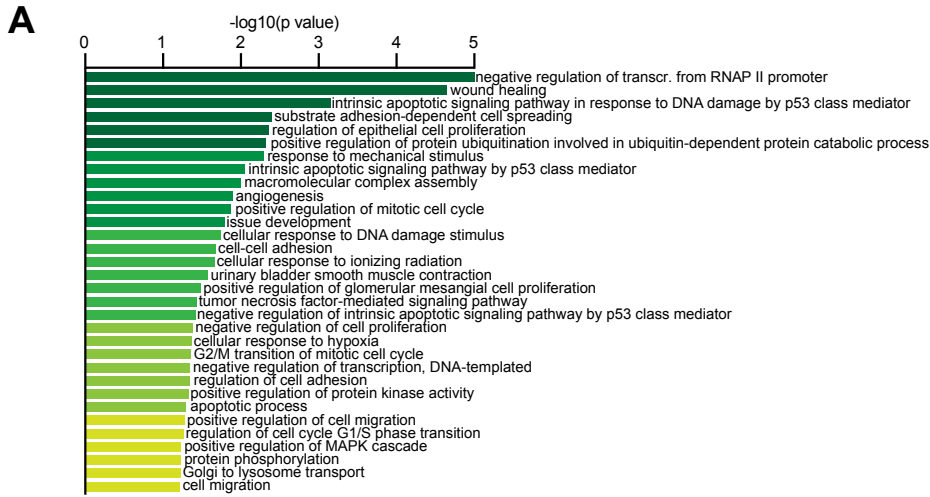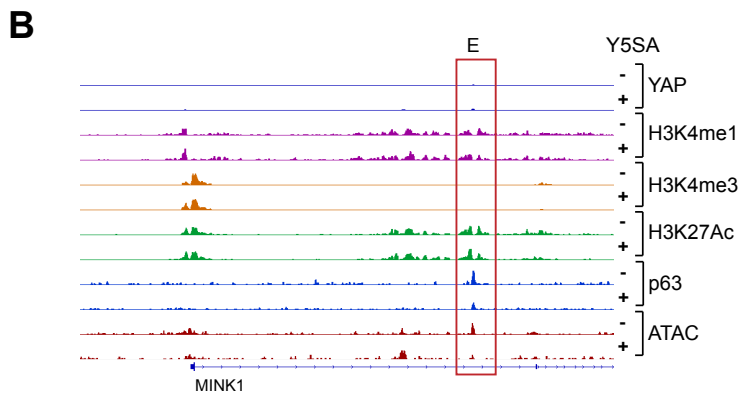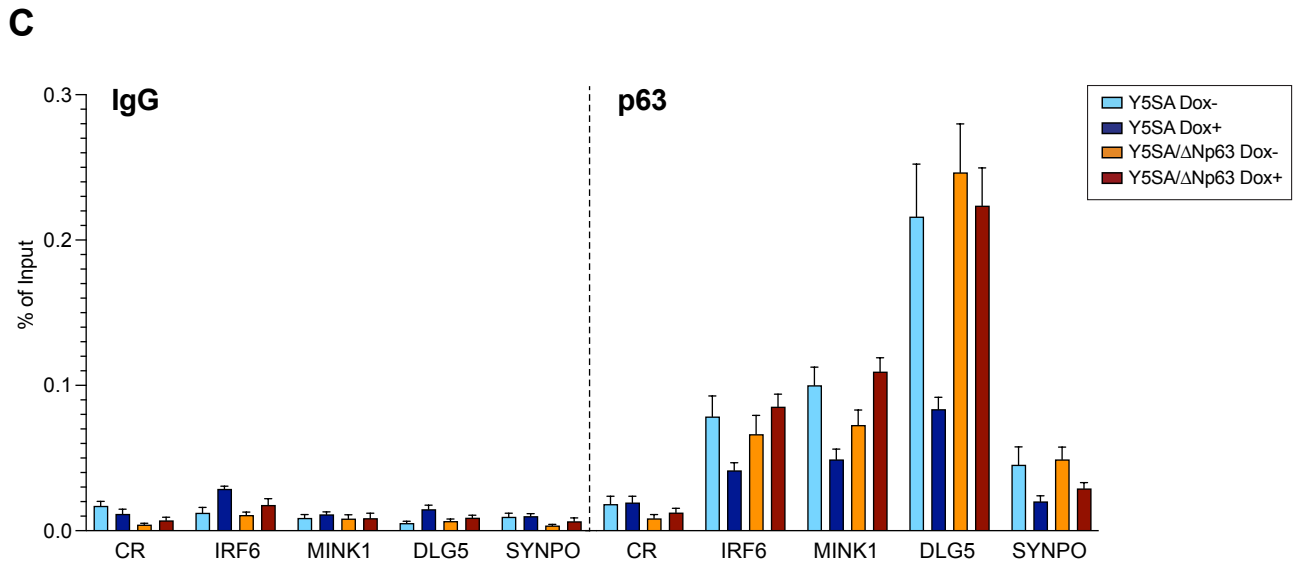

Supplementary Table 1

| motifID              | name        | variability | bootstrap_lower_bound | bootstrap_upper_bound | p_value     | p_value_adj |
|----------------------|-------------|-------------|-----------------------|-----------------------|-------------|-------------|
| MA0477.1_FOSL1       | FOSL1       | 17.98987005 | 0.412104515           | 19.70590534           | 3.68E-210   | 1.42E-207   |
| MA0490.1_JUNB        | JUNB        | 17.38345924 | 0.986094605           | 19.55546168           | 3.35E-196   | 6.47E-194   |
| MA0478.1_FOSL2       | FOSL2       | 16.34383219 | 0.375602572           | 17.60316755           | 2.19E-173   | 2.82E-171   |
| MA0476.1_FOS         | FOS         | 16.11376173 | 1.298080863           | 17.56572437           | 1.58E-168   | 1.53E-166   |
| MA0099.2_FOS::JUN    | FOS::JUN    | 15.95608783 | 0.690824246           | 17.47256852           | 3.08E-165   | 2.38E-163   |
| MA0491.1_JUND        | JUND        | 15.87339004 | 0.291231996           | 16.5539259            | 1.59E-163   | 1.02E-161   |
| MA0489.1_JUN(var.2)  | JUN(var.2)  | 14.90109462 | 0.231751543           | 15.75432283           | 4.64E-144   | 2.56E-142   |
| MA0841.1_NFE2        | NFE2        | 13.11174753 | 0.045376253           | 13.55814952           | 1.84E-111   | 8.87E-110   |
| MA0655.1_JDP2        | JDP2        | 13.01783839 | 0.298342176           | 13.7621077            | 7.24E-110   | 3.11E-108   |
| MA0462.1_BATF::JUN   | BATF::JUN   | 11.71428226 | 0.192935075           | 12.87523254           | 6.55E-89    | 2.53E-87    |
| MA0090.2_Tead1       | TEAD1       | 9.2820071   | 0.134225343           | 9.561852092           | 9.65E-56    | 3.39E-54    |
| MA0808.1_Tead3       | TEAD3       | 9.192828361 | 0.237991935           | 9.631690525           | 1.13E-54    | 3.64E-53    |
| MA0809.1_Tead4       | TEAD4       | 8.380519858 | 0.243027288           | 8.85398153            | 2.06E-45    | 6.10E-44    |
| MA0501.1_MAF::NFE2   | MAF::NFE2   | 7.965919449 | 0.648909857           | 8.7247638             | 5.08E-41    | 1.40E-39    |
| MA0102.3_CEBPA       | CEBPA       | 6.198812782 | 0.624740355           | 6.670567706           | 8.03E-25    | 2.07E-23    |
| MA0838.1_CEBPG       | CEBPG       | 5.824275418 | 0.156449774           | 6.014773596           | 6.48E-22    | 1.56E-20    |
| MA0836.1_CEBPD       | CEBPD       | 5.530719251 | 0.158477186           | 5.880894151           | 9.14E-20    | 2.08E-18    |
| MA0837.1_CEBPE       | CEBPE       | 5.472718793 | 0.271616082           | 5.824303884           | 2.36E-19    | 5.05E-18    |
| MA0466.2_CEBPB       | CEBPB       | 5.358266978 | 0.224497648           | 5.682757202           | 1.48E-18    | 3.01E-17    |
| MA0833.1_ATF4        | ATF4        | 4.254687417 | 0.123321662           | 4.651085216           | 9.65E-12    | 1.86E-10    |
| MA0043.2_HLF         | HLF         | 4.204606312 | 0.32662258            | 4.691630266           | 1.80E-11    | 3.31E-10    |
| MA0731.1_BCL6B       | BCL6B       | 3.939114435 | 0.613312842           | 4.702141048           | 4.33E-10    | 7.60E-09    |
| MA0050.2_IRF1        | IRF1        | 3.481110046 | 0.636756149           | 3.815790117           | 6.30E-08    | 1.06E-06    |
| MA0495.1_MAFF        | MAFF        | 3.456113682 | 0.196664527           | 3.723414266           | 8.12E-08    | 1.31E-06    |
| MA0088.2_ZNF143      | ZNF143      | 3.209394001 | 0.021869299           | 3.466484314           | 8.92E-07    | 1.38E-05    |
| MA0707.1_MNX1        | MNX1        | 3.123045702 | 0.095445762           | 3.620005498           | 1.97E-06    | 2.93E-05    |
| MA0093.2_USF1        | USF1        | 3.016164204 | 0.155857851           | 3.196250674           | 5.11E-06    | 7.31E-05    |
| MA0843.1_TEF         | TEF         | 2.99423699  | 0.45011733            | 3.304157778           | 6.19E-06    | 8.53E-05    |
| MA0669.1_NEUROG2     | NEUROG2     | 2.82926127  | 0.190993349           | 3.259652276           | 2.48E-05    | 0.000330237 |
| MA0842.1_NRL         | NRL         | 2.806778393 | 0.112200176           | 3.294644101           | 2.98E-05    | 0.000383216 |
| MA0783.1_PKNOX2      | PKNOX2      | 2.779574475 | 0.565878051           | 3.235775117           | 3.71E-05    | 0.000461632 |
| MA0664.1_MLX1PL      | MLX1PL      | 2.742802399 | 0.287593046           | 3.228125518           | 4.97E-05    | 0.000586762 |
| MA0639.1_DBP         | DBP         | 2.741528692 | 0.272985397           | 3.179249698           | 5.02E-05    | 0.000586762 |
| MA0740.1_KLF14       | KLF14       | 2.703844772 | 0.006850557           | 3.024336899           | 6.74E-05    | 0.000764967 |
| MA0464.2_BHLHE40     | BHLHE40     | 2.665764699 | 0.032413148           | 3.276767037           | 9.04E-05    | 0.000996783 |
| MA0496.1_MAFK        | MAFK        | 2.629347568 | 0.044675822           | 2.718141903           | 0.000119186 | 0.001277944 |
| MA0144.2_STAT3       | STAT3       | 2.584176131 | 0.079675392           | 2.817016235           | 0.000167019 | 0.001742411 |
| MA0470.1_E2F4        | E2F4        | 2.546531687 | 0.411600081           | 3.159482076           | 0.00022018  | 0.002236563 |
| MA0106.3_TP53        | TP53        | 2.53741503  | 0.781302891           | 3.043200901           | 0.000235263 | 0.002328499 |
| MA0140.2_GATA1::TAL1 | GATA1::TAL1 | 2.482593539 | 0.380038668           | 3.085776405           | 0.000348514 | 0.003363157 |
| MA0153.2_HNF1B       | HNF1B       | 2.442348236 | 0.185257692           | 2.626607767           | 0.000462292 | 0.00435231  |
| MA0662.1_MIXL1       | MIXL1       | 2.387354791 | 0.194198804           | 2.99019063            | 0.000674564 | 0.006199567 |
| MA0667.1_MYP6        | MYP6        | 2.38027268  | 0.13397129            | 2.625139401           | 0.000707716 | 0.006352982 |
| MA0668.1_NEUROD2     | NEUROD2     | 2.357410453 | 0.316491808           | 2.820583003           | 0.00082538  | 0.007240833 |
| MA0025.1_NFIL3       | NFIL3       | 2.342037987 | 0.68492268            | 2.673029088           | 0.000914465 | 0.00784408  |
| MA0073.1_RREB1       | RREB1       | 2.332212613 | 0.189599934           | 2.709955934           | 0.000976    | 0.008189913 |
| MA0745.1_SNAI2       | SNAI2       | 2.288901674 | 0.046952212           | 2.325702753           | 0.001295854 | 0.010361119 |
| MA0710.1_NOTO        | NOTO        | 2.2880999   | 0.521683956           | 2.976927133           | 0.001302599 | 0.013861119 |
| MA0137.3_STAT1       | STAT1       | 2.284287437 | 0.083483608           | 2.618042884           | 0.001335122 | 0.010361119 |
| MA0634.1_ALX3        | ALX3        | 2.283479014 | 0.058153621           | 2.8284046             | 0.001342114 | 0.010361119 |
| MA0037.2_GATA3       | GATA3       | 2.262445176 | 0.059302465           | 2.651830949           | 0.001536381 | 0.011404676 |
| MA0766.1_GATA5       | GATA5       | 2.262445176 | 0.059302465           | 2.651830949           | 0.001536381 | 0.011404676 |
| MA0163.1_PLAG1       | PLAG1       | 2.233971357 | 0.1725478             | 2.579377024           | 0.001840834 | 0.013406831 |
| MA0666.1_MSX1        | MSX1        | 2.223639488 | 0.174948716           | 2.504036932           | 0.001964406 | 0.013786557 |
| MA0708.1_MSX2        | MSX2        | 2.223639488 | 0.174948716           | 2.504036932           | 0.001964406 | 0.013786557 |
| MA0036.2_GATA2       | GATA2       | 2.219754183 | 0.141939664           | 2.57912267            | 0.002012817 | 0.013874063 |
| MA0048.2_NHLH1       | NHLH1       | 2.199771644 | 0.49930078            | 2.816697241           | 0.002279597 | 0.01543727  |
| MA0139.1_CTCF        | CTCF        | 2.179272024 | 0.024897094           | 2.215454754           | 0.002586609 | 0.01721433  |
| MA0525.2_TP63        | TP63        | 2.166658745 | 0.40705733            | 2.588324754           | 0.002794023 | 0.018279543 |
| MA0119.1_NFIC::TLX1  | NFIC::TLX1  | 2.156060838 | 0.043983426           | 2.429454321           | 0.002979871 | 0.019170505 |
| MA0823.1_HEY1        | HEY1        | 2.145642542 | 0.035885644           | 2.315959209           | 0.003173521 | 0.020081625 |
| MA0527.1_ZBTB33      | ZBTB33      | 2.121977153 | 0.106428285           | 2.438756656           | 0.003656809 | 0.022766588 |
| MA0861.1_TP73        | TP73        | 2.103991443 | 0.502359539           | 2.500972983           | 0.004067958 | 0.024924313 |
| MA0831.1_TFE3        | TFE3        | 2.079914601 | 0.157529161           | 2.376729082           | 0.004684131 | 0.028251164 |
| MA0820.1_FIGLA       | FIGLA       | 2.064366059 | 0.075917451           | 2.393049767           | 0.005125821 | 0.030439488 |
| MA0141.3_ESRRB       | ESRRB       | 2.055787184 | 0.143667774           | 2.316321879           | 0.00538535  | 0.031496139 |
| MA0763.1_ETV3        | ETV3        | 2.046213262 | 0.346786945           | 2.828734645           | 0.005688967 | 0.032775243 |
| MA0057.1_MZF1(var.2) | MZF1(var.2) | 2.036242727 | 0.332551571           | 2.31152391            | 0.006021519 | 0.034180978 |
| MA0759.1_ELK3        | ELK3        | 2.023235765 | 0.3646221             | 2.65596194            | 0.006481681 | 0.036259841 |
| MA0692.1_TFEB        | TFEB        | 2.019404261 | 0.187099823           | 2.358250959           | 0.006623147 | 0.036521923 |
| MA0647.1_GRHL1       | GRHL1       | 1.993197353 | 0.158939991           | 2.210546543           | 0.007667599 | 0.041685818 |
| MA0862.1_GMEB2       | GMEB2       | 1.975268992 | 0.53332262            | 2.25098666            | 0.008464906 | 0.0453813   |
| MA0754.1_CUX1        | CUX1        | 1.95357102  | 0.446095855           | 2.350523039           | 0.009528568 | 0.050383936 |
| MA0105.4_NFKB1       | NFKB1       | 1.947599487 | 0.450222838           | 2.334276134           | 0.009841505 | 0.051335416 |
| MA0160.1_NR4A2       | NR4A2       | 1.935930357 | 0.175266655           | 2.23543077            | 0.010479581 | 0.05393491  |
| MA0644.1_ESX1        | ESX1        | 1.920116546 | 0.658525051           | 2.527451241           | 0.011402963 | 0.057915049 |
| MA0028.2_ELK1        | ELK1        | 1.908904576 | 0.576133951           | 2.573006083           | 0.012100712 | 0.060660711 |
| MA0761.1_ETV1        | ETV1        | 1.89980918  | 0.589379693           | 2.598242444           | 0.012694273 | 0.062820375 |
| MA0875.1_BARX1       | BARX1       | 1.868159381 | 0.445086137           | 2.491696868           | 0.01496539  | 0.073122031 |
| MA0081.1_SPIB        | SPIB        | 1.861686584 | 0.115576004           | 1.957679903           | 0.015471651 | 0.073851841 |
| MA0597.1_THAP1       | THAP1       | 1.861362288 | 0.38396557            | 2.300156253           | 0.015497407 | 0.073851841 |
| MA0755.1_CUX2        | CUX2        | 1.857820502 | 0.298601667           | 2.230760688           | 0.015781163 | 0.074286939 |
| MA0526.1_USF2        | USF2        | 1.839486985 | 0.12564933            | 1.9801541             | 0.017324152 | 0.080567743 |
| MA0782.1_PKNOX1      | PKNOX1      | 1.834989266 | 0.483757941           | 2.084711056           | 0.017722301 | 0.081438194 |
| MA0660.1_MEF2B       | MEF2B       | 1.816686841 | 0.088270151           | 2.225855137           | 0.019408595 | 0.088137853 |
| MA0610.1_DMRT3       | DMRT3       | 1.807910207 | 0.03527888            | 2.127607791           | 0.020292818 | 0.091081717 |
| MA0046.2_HNF1A       | HNF1A       | 1.802460614 | 0.120525909           | 2.099172117           | 0.020847684 | 0.092496621 |
| MA0653.1_IRF9        | IRF9        | 1.78971289  | 0.359677226           | 2.173575024           | 0.022197419 | 0.09736595  |
| MA0630.1_SHOX        | SHOX        | 1.77793367  | 0.080560439           | 2.116789193           | 0.023511353 | 0.098645461 |
| MA0702.1_LMX1A       | LMX1A       | 1.77793367  | 0.080560439           | 2.116789193           | 0.023511353 | 0.098645461 |
| MA0703.1_LMX1B       | LMX1B       | 1.77793367  | 0.080560439           | 2.116789193           | 0.023511353 | 0.098645461 |
| MA0721.1_UNCX        | UNCX        | 1.77793367  | 0.080560439           | 2.116789193           | 0.023511353 | 0.098645461 |

|                              |                     |             |             |             |             |             |
|------------------------------|---------------------|-------------|-------------|-------------|-------------|-------------|
| MA0824.1_ID4                 | ID4                 | 1.771030784 | 0.219383946 | 2.083859037 | 0.024312213 | 0.100908757 |
| MA0663.1_MLX                 | MLX                 | 1.765478304 | 0.201561741 | 2.219871957 | 0.024973406 | 0.101567786 |
| MA0714.1_PITX3               | PITX3               | 1.765280424 | 0.321980425 | 2.216000538 | 0.024997253 | 0.101567786 |
| MA0830.1_TCF4                | TCF4                | 1.74707966  | 0.175072321 | 2.167151744 | 0.027276409 | 0.109673894 |
| MA0636.1_BHLHE41             | BHLHE41             | 1.726530552 | 0.011856692 | 2.103464129 | 0.030062185 | 0.119628902 |
| MA0697.1_ZIC3                | ZIC3                | 1.722353768 | 0.250689294 | 2.004518834 | 0.030657261 | 0.12075207  |
| MA0481.1_FOXP1               | FOXP1               | 1.715669943 | 0.161988917 | 2.084680736 | 0.031630464 | 0.122903086 |
| MA0902.1_HOXB2               | HOXB2               | 1.71376972  | 0.199415302 | 2.112424527 | 0.031911915 | 0.122903086 |
| MA0259.1_ARNT::HIF1A         | ARNT::HIF1A         | 1.712116079 | 0.066710169 | 2.417190417 | 0.032158579 | 0.122903086 |
| MA0797.1_TGIF2               | TGIF2               | 1.70929679  | 0.192630426 | 1.845526867 | 0.032582866 | 0.123303786 |
| MA0818.1_BHLHE22             | BHLHE22             | 1.705536774 | 0.206782234 | 2.022262495 | 0.033156142 | 0.124255057 |
| MA0825.1_MNT                 | MNT                 | 1.689439988 | 0.230456163 | 2.018573414 | 0.035708382 | 0.132533034 |
| MA0719.1_RHOXF1              | RHOXF1              | 1.677321532 | 0.007961122 | 1.752303571 | 0.037738061 | 0.138732299 |
| MA0659.1_MAFG                | MAFG                | 1.662268731 | 0.073721475 | 1.960318871 | 0.040394194 | 0.145419409 |
| MA0652.1_IRF8                | IRF8                | 1.659383319 | 0.027704318 | 1.940378873 | 0.040920914 | 0.145419409 |
| MA0778.1_NFKB2               | NFKB2               | 1.658615503 | 0.353790462 | 1.999096085 | 0.041062045 | 0.145419409 |
| MA0077.1_SOX9                | SOX9                | 1.65860472  | 0.231994128 | 1.839023343 | 0.041064003 | 0.145419409 |
| MA0122.2_NKX3-2              | NKX3-2              | 1.648813182 | 0.014484017 | 1.885940259 | 0.042900046 | 0.150540163 |
| MA0522.2_TCF3                | TCF3                | 1.621945918 | 0.049396111 | 1.874579628 | 0.048294554 | 0.167943224 |
| MA0658.1_LHX6                | LHX6                | 1.594690882 | 0.013036269 | 1.95504662  | 0.054332064 | 0.18724076  |
| MA0600.2_RFX2                | RFX2                | 1.592625136 | 0.036832616 | 1.736996217 | 0.054814005 | 0.18724076  |
| MA0775.1_MEIS3               | MEIS3               | 1.58497886  | 0.290554512 | 1.946398714 | 0.056628649 | 0.191742619 |
| MA0888.1_EVX2                | EVX2                | 1.571426395 | 0.206016087 | 1.882593345 | 0.05996623  | 0.19974202  |
| MA0863.1_MTF1                | MTF1                | 1.571189    | 0.000716482 | 1.85474069  | 0.060026099 | 0.19974202  |
| MA0472.2_EGR2                | EGR2                | 1.555885673 | 0.070428358 | 1.742161894 | 0.063989893 | 0.209259002 |
| MA0642.1_EN2                 | EN2                 | 1.554644965 | 0.160596305 | 2.189350261 | 0.064320385 | 0.209259002 |
| MA0497.1_MEF2C               | MEF2C               | 1.552407597 | 0.209198276 | 1.770604531 | 0.064919871 | 0.209259002 |
| MA0718.1_RAX                 | RAX                 | 1.55190704  | 0.307032721 | 2.020979092 | 0.065054612 | 0.209259002 |
| MA0027.2_EN1                 | EN1                 | 1.546606644 | 0.085455001 | 1.755468817 | 0.066495375 | 0.210387007 |
| MA0068.2_PAX4                | PAX4                | 1.546606644 | 0.085455001 | 1.755468817 | 0.066495375 | 0.210387007 |
| MA0855.1_RXRB                | RXRB                | 1.54233739  | 0.17600491  | 1.945470769 | 0.067674586 | 0.212377155 |
| MA0734.1_GLI2                | GLI2                | 1.532636318 | 0.26485361  | 1.86085313  | 0.070417144 | 0.219201754 |
| MA0871.1_TFEC                | TFEC                | 1.529596518 | 0.305181387 | 1.87824416  | 0.071294747 | 0.220158179 |
| MA0155.1_INSM1               | INSM1               | 1.526148104 | 0.210140292 | 1.783703969 | 0.072300973 | 0.220581072 |
| MA0765.1_ETV5                | ETV5                | 1.525217046 | 0.323383323 | 1.914584527 | 0.072574601 | 0.220581072 |
| MA0903.1_HOXB3               | HOXB3               | 1.513027521 | 0.244708767 | 1.834327278 | 0.076234414 | 0.229894404 |
| MA0798.1_RFX3                | RFX3                | 1.493908093 | 0.469845676 | 2.03748818  | 0.082271083 | 0.246175488 |
| MA0502.1_NFYB                | NFYB                | 1.443468673 | 0.07659961  | 1.564027529 | 0.100025544 | 0.296998924 |
| MA0737.1_GLIS3               | GLIS3               | 1.424309965 | 0.305103048 | 1.884028472 | 0.107501382 | 0.316759797 |
| MA0091.1_TAL1::TCF3          | TAL1::TCF3          | 1.416678445 | 0.10641364  | 1.537678056 | 0.110596197 | 0.323410091 |
| MA0649.1_HEY2                | HEY2                | 1.409360709 | 0.000793822 | 1.427727913 | 0.113627396 | 0.329775752 |
| MA0773.1_MEF2D               | MEF2D               | 1.407308441 | 0.185837359 | 1.714861953 | 0.114488775 | 0.329796025 |
| MA0733.1_EGR4                | EGR4                | 1.400817244 | 0.239208757 | 1.637039072 | 0.117246021 | 0.335236771 |
| MA0794.1_PROX1               | PROX1               | 1.390553403 | 0.059271126 | 1.437446002 | 0.121708188 | 0.345436476 |
| MA0822.1_HES7                | HES7                | 1.377991618 | 0.071867125 | 1.685067646 | 0.127342314 | 0.358789292 |
| MA0052.3_MEF2A               | MEF2A               | 1.373428408 | 0.143452085 | 1.650511534 | 0.129436634 | 0.362047396 |
| MA0779.1_PAX1                | PAX1                | 1.359975178 | 0.410126327 | 1.755130548 | 0.135760673 | 0.377004458 |
| MA0768.1_LEF1                | LEF1                | 1.351506724 | 0.11832921  | 1.617946683 | 0.139857156 | 0.38560616  |
| MA0017.2_NR2F1               | NR2F1               | 1.347807404 | 0.440748938 | 1.836331356 | 0.141674939 | 0.387847705 |
| MA0628.1_POU6F1              | POU6F1              | 1.336071563 | 0.420048745 | 1.753025226 | 0.147556471 | 0.401104211 |
| MA0906.1_HOXC12              | HOXC12              | 1.320733518 | 0.036427971 | 1.453338602 | 0.155508742 | 0.419764856 |
| MA0748.1_YY2                 | YY2                 | 1.302287122 | 0.171630234 | 1.464664357 | 0.165475837 | 0.442024557 |
| MA0889.1_GBX1                | GBX1                | 1.299108712 | 0.15776162  | 1.804774557 | 0.167238081 | 0.442024557 |
| MA0803.1_TBX15               | TBX15               | 1.297055526 | 0.178289718 | 1.593858952 | 0.168411462 | 0.442024557 |
| MA0030.1_FOXF2               | FOXF2               | 1.295804329 | 0.147862159 | 1.497294356 | 0.169084275 | 0.442024557 |
| MA0839.1_CREB3L1             | CREB3L1             | 1.295097627 | 0.005849593 | 1.544817246 | 0.169480918 | 0.442024557 |
| MA0844.1_XBP1                | XBP1                | 1.286993651 | 0.196268392 | 1.674807594 | 0.174076943 | 0.45096443  |
| MA0876.1_BSX                 | BSX                 | 1.278398866 | 0.382031345 | 1.506112168 | 0.179046099 | 0.46017032  |
| MA0865.1_E2F8                | E2F8                | 1.276742795 | 0.048248496 | 1.486440128 | 0.180014814 | 0.46017032  |
| MA0079.3_SP1                 | SP1                 | 1.26926453  | 0.012619692 | 1.496685987 | 0.184434554 | 0.463586307 |
| MA0756.1_ONECUT2             | ONECUT2             | 1.265699663 | 0.070864753 | 1.566300759 | 0.186567603 | 0.463586307 |
| MA0528.1_ZNF263              | ZNF263              | 1.265250297 | 0.014012887 | 1.359970594 | 0.186837683 | 0.463586307 |
| MA0900.1_HOXA2               | HOXA2               | 1.264500336 | 0.187989072 | 1.570481855 | 0.187289028 | 0.463586307 |
| MA0635.1_BARHL2              | BARHL2              | 1.262773148 | 0.048508708 | 1.504110223 | 0.188331341 | 0.463586307 |
| MA0084.1_SRY                 | SRY                 | 1.262399875 | 0.142840654 | 1.616693238 | 0.188557125 | 0.463586307 |
| MA0513.1_SMAD2::SMAD3::SMAD4 | SMAD2::SMAD3::SMAD4 | 1.24900782  | 0.069634935 | 1.49609844  | 0.196780629 | 0.479022306 |
| MA0161.1_NFIC                | NFIC                | 1.247032382 | 0.165090232 | 1.515993046 | 0.19801394  | 0.479022306 |
| MA0813.1_TFAP2B(var.3)       | TFAP2B(var.3)       | 1.24616284  | 0.271260775 | 1.648839202 | 0.198558469 | 0.479022306 |
| MA0744.1_SCRT2               | SCRT2               | 1.228089299 | 0.002618433 | 1.464431556 | 0.21010561  | 0.502710556 |
| MA0672.1_NKX2-3              | NKX2-3              | 1.226744687 | 0.067382588 | 1.333286731 | 0.210982151 | 0.502710556 |
| MA0162.2_EGR1                | EGR1                | 1.224712721 | 0.169377892 | 1.556785767 | 0.212311361 | 0.502774144 |
| MA0479.1_FOXB1               | FOXB1               | 1.213908637 | 0.021185816 | 1.253854827 | 0.219471602 | 0.51656121  |
| MA0791.1_POU4F3              | POU4F3              | 1.206202197 | 0.092214625 | 1.308264193 | 0.224674227 | 0.523881353 |
| MA0764.1_ETV4                | ETV4                | 1.203655288 | 0.071961513 | 1.508831912 | 0.226411069 | 0.523881353 |
| MA0523.1_TCF7L2              | TCF7L2              | 1.203301038 | 0.020132758 | 1.408284338 | 0.226653331 | 0.523881353 |
| MA0051.1_IRF2                | IRF2                | 1.198621716 | 0.14859947  | 1.431470002 | 0.229869086 | 0.528151591 |
| MA0892.1_GSX1                | GSX1                | 1.190631831 | 0.33470314  | 1.556716642 | 0.235427259 | 0.533632674 |
| MA0156.2_FEV                 | FEV                 | 1.188180042 | 0.230061639 | 1.654353421 | 0.237149839 | 0.533632674 |
| MA0475.2_FLI1                | FLI1                | 1.187642276 | 0.322939086 | 1.526292736 | 0.237528728 | 0.533632674 |
| MA0886.1_EMX2                | EMX2                | 1.18561108  | 0.366599277 | 1.606208993 | 0.238963286 | 0.533632674 |
| MA0058.3_MAX                 | MAX                 | 1.1853233   | 0.28077314  | 1.47838602  | 0.239166976 | 0.533632674 |
| MA0805.1_TBX1                | TBX1                | 1.18298274  | 0.084465501 | 1.414606536 | 0.240827686 | 0.543249924 |
| MA0648.1_GSC                 | GSC                 | 1.175629814 | 0.168572212 | 1.419027579 | 0.246091894 | 0.542808406 |
| MA0694.1_ZBTB7B              | ZBTB7B              | 1.17251316  | 0.160156672 | 1.467921882 | 0.248344699 | 0.544665079 |
| MA0593.1_FOXP2               | FOXP2               | 1.16659635  | 0.181436032 | 1.40577419  | 0.252656611 | 0.548368506 |
| MA0873.1_HOXD12              | HOXD12              | 1.165360823 | 0.01126845  | 1.478615751 | 0.253562795 | 0.548368506 |
| MA0868.1_SOX8                | SOX8                | 1.164364161 | 0.386918803 | 1.372384018 | 0.25429524  | 0.548368506 |
| MA0901.1_HOXB13              | HOXB13              | 1.142011921 | 0.291363665 | 1.524451553 | 0.27106066  | 0.578979149 |
| MA0738.1_HIC2                | HIC2                | 1.141450274 | 0.0049578   | 1.166525745 | 0.271490223 | 0.578979149 |
| MA0700.1_LHX2                | LHX2                | 1.139470063 | 0.081530523 | 1.573248985 | 0.273007959 | 0.579016881 |
| MA0673.1_NKX2-8              | NKX2-8              | 1.129919916 | 0.123195135 | 1.346946523 | 0.280397792 | 0.591440152 |
| MA0059.1_MAX::MYC            | MAX::MYC            | 1.125647282 | 0.370297854 | 1.531505334 | 0.283741302 | 0.595239905 |
| MA0767.1_GCM2                | GCM2                | 1.112575163 | 0.08335472  | 1.397027304 | 0.294112663 | 0.609640507 |
| MA0070.1_PBX1                | PBX1                | 1.111623247 | 0.153725252 | 1.360544723 | 0.294876195 | 0.609640507 |
| MA0894.1_HESX1               | HESX1               | 1.11104074  | 0.095871892 | 1.553941623 | 0.295343976 | 0.609640507 |
| MA0893.1_GSX2                | GSX2                | 1.097690764 | 0.1469186   | 1.404985244 | 0.306178425 | 0.628642937 |
| MA0595.1_SREBF1              | SREBF1              | 1.093045898 | 0.35889993  | 1.451698719 | 0.309998694 | 0.633119027 |
| MA0774.1_MEIS2               | MEIS2               | 1.087959381 | 0.332767464 | 1.436062141 | 0.314211804 | 0.638346086 |

|                        |               |             |             |             |             |              |
|------------------------|---------------|-------------|-------------|-------------|-------------|--------------|
| MA0665.1_MSC           | MSC           | 1.085549537 | 0.02223647  | 1.298624374 | 0.316218576 | 0.63905953   |
| MA0786.1_POU3F1        | POU3F1        | 1.077504855 | 0.055486483 | 1.30882108  | 0.322967124 | 0.648508954  |
| MA0698.1_ZBTB18        | ZBTB18        | 1.075980391 | 0.262810322 | 1.372361126 | 0.324254477 | 0.648508954  |
| MA0024.3_E2F1          | E2F1          | 1.073821825 | 0.06233017  | 1.301614896 | 0.326018905 | 0.6488802141 |
| MA0688.1_TBX2          | TBX2          | 1.059476447 | 0.109199769 | 1.277962056 | 0.338361793 | 0.66816237   |
| MA0138.2_REST          | REST          | 1.057030828 | 0.027321525 | 1.25698148  | 0.340478397 | 0.66816237   |
| MA0638.1_CREB3         | CREB3         | 1.056423388 | 0.344468904 | 1.259318772 | 0.341005147 | 0.66816237   |
| MA0812.1_TFAP2B(var.2) | TFAP2B(var.2) | 1.027511277 | 0.106070258 | 1.39830447  | 0.366537516 | 0.713644961  |
| MA0511.2_RUNX2         | RUNX2         | 1.024882962 | 0.147567634 | 1.249140323 | 0.368902019 | 0.713644961  |
| MA0828.1_SREBF2(var.2) | SREBF2(var.2) | 1.023874754 | 0.130080047 | 1.24724317  | 0.369810888 | 0.713644961  |
| MA0498.2_MEI51         | MEI51         | 1.021878969 | 0.170330038 | 1.209557559 | 0.371613049 | 0.713644961  |
| MA0914.1_ISL2          | ISL2          | 1.018230086 | 0.128504322 | 1.232927185 | 0.374918231 | 0.716427906  |
| MA0802.1_TBR1          | TBR1          | 1.014409567 | 0.280454413 | 1.221808739 | 0.378393001 | 0.719505904  |
| MA0071.1_RORA          | RORA          | 1.01104808  | 0.009363743 | 1.242458447 | 0.381462076 | 0.721786085  |
| MA0154.3_EBF1          | EBF1          | 1.006464782 | 0.06295864  | 1.220074505 | 0.385664219 | 0.72309736   |
| MA0072.1_RORA(var.2)   | RORA(var.2)   | 1.003145157 | 0.194369633 | 1.223388251 | 0.388720243 | 0.72309736   |
| MA0474.2_ERG           | ERG           | 1.003063114 | 0.360754856 | 1.355231591 | 0.388795902 | 0.72309736   |
| MA0732.1_EGR3          | EGR3          | 1.000288228 | 0.146581442 | 1.293037969 | 0.391358588 | 0.72309736   |
| MA0758.1_E2F7          | E2F7          | 1.000111941 | 0.098553055 | 1.157991297 | 0.391521627 | 0.72309736   |
| MA0815.1_TFAP2C(var.3) | TFAP2C(var.3) | 0.992196417 | 0.279386998 | 1.365324006 | 0.398872002 | 0.732852069  |
| MA0872.1_TFAP2A(var.3) | TFAP2A(var.3) | 0.990343839 | 0.287749783 | 1.325985674 | 0.400600484 | 0.732852069  |
| MA0784.1_POU1F1        | POU1F1        | 0.987461105 | 0.132125116 | 1.371429902 | 0.403296097 | 0.734303271  |
| MA0661.1_MEOX1         | MEOX1         | 0.971005644 | 0.016661882 | 1.144102572 | 0.418820658 | 0.758049713  |
| MA0131.2_HINFP         | HINFP         | 0.969485768 | 0.03046079  | 1.183321956 | 0.420265903 | 0.758049713  |
| MA0060.2_NFYA          | NFYA          | 0.967280804 | 0.167461711 | 1.199321379 | 0.422365895 | 0.758294118  |
| MA0777.1_MYBL2         | MYBL2         | 0.956528726 | 0.237231575 | 1.283589874 | 0.432666064 | 0.771103028  |
| MA0752.1_ZNF410        | ZNF410        | 0.955660544 | 0.265894956 | 1.237830707 | 0.433495744 | 0.771103028  |
| MA0148.3_FOXA1         | FOXA1         | 0.952641901 | 0.099047333 | 1.176218925 | 0.436403727 | 0.772714855  |
| MA0711.1_OTX1          | OTX1          | 0.949847877 | 0.161352431 | 1.215498928 | 0.439101267 | 0.773941047  |
| MA0706.1_MEOX2         | MEOX2         | 0.941138587 | 0.323643577 | 1.113202374 | 0.447545378 | 0.782734896  |
| MA0469.2_E2F3          | E2F3          | 0.938406857 | 0.02479194  | 1.134751088 | 0.450204689 | 0.782734896  |
| MA0887.1_EVX1          | EVX1          | 0.938084707 | 0.056450564 | 1.103434106 | 0.450518628 | 0.782734896  |
| MA0650.1_HOXA13        | HOXA13        | 0.936358751 | 0.011775748 | 1.097605526 | 0.452201766 | 0.782734896  |
| MA0014.2_PAX5          | PAX5          | 0.916715773 | 0.001795899 | 1.067572192 | 0.471489292 | 0.806021491  |
| MA0641.1_ELF4          | ELF4          | 0.91435048  | 0.053696462 | 1.056326475 | 0.473827135 | 0.806021491  |
| MA0806.1_TBX4          | TBX4          | 0.914040571 | 0.109756154 | 1.096569747 | 0.474133677 | 0.806021491  |
| MA0807.1_TBX5          | TBX5          | 0.914040571 | 0.109756154 | 1.096569747 | 0.474133677 | 0.806021491  |
| MA0130.1_ZNF354C       | ZNF354C       | 0.912058354 | 0.274665934 | 1.098320104 | 0.476095596 | 0.806021491  |
| MA0103.2_ZEB1          | ZEB1          | 0.895350565 | 0.113524366 | 1.108336524 | 0.492712378 | 0.827656392  |
| MA0799.1_RFX4          | RFX4          | 0.891473965 | 0.0822678   | 1.002683789 | 0.496586774 | 0.827656392  |
| MA0712.1_OTX2          | OTX2          | 0.889675302 | 0.187549772 | 1.114073631 | 0.498386633 | 0.827656392  |
| MA0101.1_REL           | REL           | 0.888488094 | 0.1798241   | 1.051828326 | 0.49957538  | 0.827656392  |
| MA0690.1_TBX21         | TBX21         | 0.888467807 | 0.260117605 | 1.02284299  | 0.499595698 | 0.827656392  |
| MA0891.1_GSC2          | GSC2          | 0.882001333 | 0.032257354 | 1.058698535 | 0.506080641 | 0.834816784  |
| MA0729.1_RARA          | RARA          | 0.877244147 | 0.220488598 | 1.14561295  | 0.510861641 | 0.839117419  |
| MA0895.1_HMBOX1        | HMBOX1        | 0.865705522 | 0.18772159  | 1.038688229 | 0.522490122 | 0.854851301  |
| MA0800.1_EOMES         | EOMES         | 0.862480974 | 0.208916121 | 1.046160073 | 0.525747044 | 0.856279996  |
| MA0750.1_ZBTB7A        | ZBTB7A        | 0.855020546 | 0.033890936 | 1.046843178 | 0.533292868 | 0.864920366  |
| MA0646.1_GCM1          | GCM1          | 0.849671006 | 0.103951022 | 1.027382252 | 0.538711616 | 0.870053071  |
| MA0792.1_POU5F1B       | POU5F1B       | 0.846785376 | 0.026350285 | 1.036790986 | 0.541636985 | 0.871132818  |
| MA0780.1_PAX3          | PAX3          | 0.834662958 | 0.006643015 | 0.994319146 | 0.553941165 | 0.879986331  |
| MA0076.2_ELK4          | ELK4          | 0.831664354 | 0.139717722 | 1.086953797 | 0.556987621 | 0.879986331  |
| MA0115.1_NR1H2::RXRA   | NR1H2::RXRA   | 0.82828932  | 0.159489505 | 1.010237176 | 0.560417491 | 0.879986331  |
| MA0730.1_RARA(var.2)   | RARA(var.2)   | 0.823164858 | 0.019680502 | 0.897190826 | 0.565626691 | 0.879986331  |
| MA0080.4_SPI1          | SPI1          | 0.821850039 | 0.034865599 | 1.004678479 | 0.566963456 | 0.879986331  |
| MA0506.1_NRF1          | NRF1          | 0.820435804 | 0.011000752 | 0.995809372 | 0.568401359 | 0.879986331  |
| MA0821.1_HESS          | HESS          | 0.817416462 | 0.086791588 | 0.993510539 | 0.571471368 | 0.879986331  |
| MA0890.1_GBX2          | GBX2          | 0.816896385 | 0.077222831 | 1.074579534 | 0.572000184 | 0.879986331  |
| MA0598.2_EHF           | EHF           | 0.816842886 | 0.059821889 | 1.099992413 | 0.572055191 | 0.879986331  |
| MA0524.2_TFAP2C        | TFAP2C        | 0.813814516 | 0.204901281 | 1.11368267  | 0.575133812 | 0.879986331  |
| MA0484.1_HNF4G         | HNF4G         | 0.811511063 | 0.052379354 | 0.927717465 | 0.577475861 | 0.879986331  |
| MA0866.1_SOX21         | SOX21         | 0.806932166 | 0.148823953 | 0.970743395 | 0.582130924 | 0.879986331  |
| MA0845.1_FOXB1         | FOXB1         | 0.806153431 | 0.139179166 | 1.126034044 | 0.582922507 | 0.879986331  |
| MA0517.1_STAT1::STAT2  | STAT1::STAT2  | 0.798770445 | 0.106129731 | 1.030150504 | 0.590424974 | 0.879986331  |
| MA0724.1_VENTX         | VENTX         | 0.798534329 | 0.273597149 | 1.066566458 | 0.590664826 | 0.879986331  |
| MA0018.2_CREB1         | CREB1         | 0.794918537 | 0.165533477 | 1.054715978 | 0.594337013 | 0.879986331  |
| MA0699.1_LBX2          | LBX2          | 0.794609878 | 0.114636295 | 0.957351556 | 0.59465041  | 0.879986331  |
| MA0826.1_OLIG1         | OLIG1         | 0.793525214 | 0.032669736 | 0.975522999 | 0.595751619 | 0.879986331  |
| MA0817.1_BHLHE23       | BHLHE23       | 0.789764492 | 0.084991952 | 1.012186244 | 0.599568361 | 0.879986331  |
| MA0785.1_POU2F1        | POU2F1        | 0.784382529 | 0.16608468  | 0.895187186 | 0.605026339 | 0.879986331  |
| MA0618.1_LBX1          | LBX1          | 0.780761614 | 0.134005634 | 0.944154608 | 0.608695208 | 0.879986331  |
| MA0654.1_ISX           | ISX           | 0.780761614 | 0.134005634 | 0.944154608 | 0.608695208 | 0.879986331  |
| MA0675.1_NKX6-2        | NKX6-2        | 0.780761614 | 0.134005634 | 0.944154608 | 0.608695208 | 0.879986331  |
| MA0701.1_LHX9          | LHX9          | 0.780761614 | 0.134005634 | 0.944154608 | 0.608695208 | 0.879986331  |
| MA0716.1_PRRX1         | PRRX1         | 0.780761614 | 0.134005634 | 0.944154608 | 0.608695208 | 0.879986331  |
| MA0717.1_RAX2          | RAX2          | 0.780761614 | 0.134005634 | 0.944154608 | 0.608695208 | 0.879986331  |
| MA0882.1_DLX6          | DLX6          | 0.780761614 | 0.134005634 | 0.944154608 | 0.608695208 | 0.879986331  |
| MA0743.1_SCRT1         | SCRT1         | 0.775695135 | 0.050757368 | 0.927359621 | 0.61382383  | 0.884089546  |
| MA0069.1_Pax6          | Pax6          | 0.760660026 | 0.134935613 | 0.930118501 | 0.629001752 | 0.894918848  |
| MA0003.3_TFAP2A        | TFAP2A        | 0.758101589 | 0.097660275 | 0.89552114  | 0.631577215 | 0.894918848  |
| MA0753.1_ZNF740        | ZNF740        | 0.758054102 | 0.02048379  | 0.922158842 | 0.631624996 | 0.894918848  |
| MA0152.1_NFATC2        | NFATC2        | 0.756765994 | 0.163714917 | 0.976671694 | 0.632920807 | 0.894918848  |
| MA0471.1_E2F6          | E2F6          | 0.756751993 | 0.047558994 | 0.925351906 | 0.632934833 | 0.894918848  |
| MA0640.1_ELF3          | ELF3          | 0.751084756 | 0.026903426 | 0.894581602 | 0.638628124 | 0.898330231  |
| MA0670.1_NFIA          | NFIA          | 0.749715134 | 0.23844105  | 0.864661089 | 0.640002107 | 0.898330231  |
| MA0687.1_SPIC          | SPIC          | 0.746475828 | 0.159717676 | 0.975032436 | 0.643248563 | 0.899615743  |
| MA0827.1_OLIG3         | OLIG3         | 0.7422257   | 0.08406405  | 0.869109838 | 0.647469739 | 0.902520251  |
| MA0689.1_TBX20         | TBX20         | 0.735210887 | 0.204698119 | 0.874768838 | 0.654500981 | 0.90580949   |
| MA0159.1_RARA::RXRA    | RARA::RXRA    | 0.734993795 | 0.029707795 | 0.992531    | 0.654717222 | 0.90580949   |
| MA0098.3_ETS1          | ETS1          | 0.732295031 | 0.021581817 | 0.906704188 | 0.657403364 | 0.906277494  |
| MA0158.1_HOXA5         | HOXA5         | 0.72752236  | 0.237877332 | 0.864802324 | 0.662144162 | 0.907529625  |
| MA0789.1_POU3F4        | POU3F4        | 0.726664523 | 0.229384367 | 0.86336161  | 0.663013871 | 0.907529625  |
| MA0793.1_POU6F2        | POU6F2        | 0.71766611  | 0.030103369 | 0.839317177 | 0.671893293 | 0.910272219  |
| MA0083.3_SRF           | SRF           | 0.717137776 | 0.237210012 | 0.837870435 | 0.672414283 | 0.910272219  |
| MA0637.1_CENPB         | CENPB         | 0.716640579 | 0.06660836  | 1.010254135 | 0.672904296 | 0.910272219  |
| MA0149.1_EWSR1-FL11    | EWSR1-FL11    | 0.715070949 | 0.054106366 | 0.866850861 | 0.674450401 | 0.910272219  |
| MA0596.1_SREBF2        | SREBF2        | 0.700584261 | 0.027072152 | 0.962791105 | 0.688642154 | 0.914003832  |
| MA0801.1_MGA           | MGA           | 0.696080604 | 0.171629073 | 0.788929756 | 0.693023646 | 0.914003832  |













### Supplementary Table 3: Oligonucleotide and siRNA sequences

#### ATAC-seq

| Name     | Sequence                                                 |
|----------|----------------------------------------------------------|
| Ad1_noMX | AATGATACGGCGACCACCGAGATCTACACTCGTCGGCAGCGTCAGATGT*G      |
| Ad2.1    | CAAGCAGAAGACGGCATAACGAGATTCGCCCTTAGTCTCGTGGGCTCGGAGATG*T |
| Ad2.2    | CAAGCAGAAGACGGCATAACGAGATCTAGTACGGTCTCGTGGGCTCGGAGATG*T  |
| Ad2.3    | CAAGCAGAAGACGGCATAACGAGATTTCTGCCCTGCTCGTGGGCTCGGAGATG*T  |
| Ad2.4    | CAAGCAGAAGACGGCATAACGAGATGCTCAGGAGTCTCGTGGGCTCGGAGATG*T  |

#### ChIP-qPCR

| Region           | fw primer             | bw primer             |
|------------------|-----------------------|-----------------------|
| CDC20 -41        | GGTTGCGACGGTTGGATTTT  | CTTTAACACGCCTGGCTTACG |
| CDC20 -428       | GGCTCTCCTTCCCCTTCTAG  | TCCGAGAACCTGCAGAAGTT  |
| CDC20 +120       | GGTGGCCCTGATTTTGTGG   | CTGGAGGAAAGGAGGCGAC   |
| CDC20 +1827      | TCCACCACCATGATGTTCCGG | CACTGGCCAAATGTCGTCCA  |
| CDC20 +4020      | GAGTCTGACCATGAGCCCAG  | CTCAGGGTCTCATCTGCTGC  |
| CDC20 +4113      | ATGGCGCTGTTTTGAGTTGG  | ACTGAGGTGATGGGTTGGTC  |
| CDC20 enhancer 1 | CCTGCAGAGTGAGCCATGTG  | GAGCTGGCTGTGTCCTTTGA  |
| CDC20 enhancer 2 | AAATACTCTTGGCCACGCAC  | AGTCTACCATGCTGCCTAG   |
| CDC20 TES        | ACCTTTGGCCAGAAGCTAC   | CAAAGGGTCTCGTGGCCTT   |
| CDC6 promoter    | CTGTGGCCATTTCGGATT    | CCCCTGAACAAACTGCACA   |
| DLG5 enhancer    | TGAGTGCCTCGAGGAAGTG   | TCTACTTCCTTACCGCTGC   |
| GAPDHS (CR)      | GGCAGCAAGAGTCACTCCA   | TGTCTTTGAAGCACACAGGTT |
| IRF6 enhancer    | TCCTTGACCCTGATTGAGCC  | TCCAGACATTGACGCAGGTA  |
| KIF23 promoter   | CCTAACGTCCCAGCTCTT    | GCCTCGTACTCACGCTGAC   |
| MINK1 enhancer   | TCACACATCCTCTGGCATA   | AGAAGGAAGCGAAGAAACC   |
| NCAPH promoter   | CTGCCTCACACTCCTCAGTT  | CAACGGTAACCACATCGCTT  |
| RRM1 promoter    | CAGTCTGTGAAGCCTACCCC  | GCGCAACAATCCAAATCCCC  |
| SYNPO enhancer   | CACGAGTCCCCTGTACCTG   | AGCCTGTGCTACACACAGCA  |
| TOP2A promoter   | GGTGCCTTTTGAAGCCTCTC  | TCCACCTATGAACGGCTGAG  |

#### RT-qPCR primers

| Gene   | fw primer                   | bw primer                 |
|--------|-----------------------------|---------------------------|
| AMOTL2 | AGGCTGCAGAGAGACAATGAG       | CTCAGAGAGCCGCTGGATT       |
| AURKA  | GCAGATTTTGGGTGGTCACT        | TCCGACCTTCAATCATTCA       |
| CDC20  | CTGTCTGAGTGCCGTGGAT         | TCCTTGTAAATGGGGAGACCA     |
| DLG5   | ACCAGAAGGAGATCGGTGAC        | ATCTCGGATGACCCGTTGT       |
| IRF6   | TTTGTCTGGAAACATTCCTTAGC     | CCCCAAAGCATAAGTAGATCTCAA  |
| MINK1  | AGAAGCGGGGTGAGAAAGA         | CGTTCAATGATGGAGCTTGG      |
| ΔNp63  | GAAAACAATGCCAGACTCAA        | TGCGCGTGGTCTGTGTTA        |
| p53    | AGGCCTTGGAACTCAAGGAT        | CCCTTTTGGACTTCAGGTTG      |
| p63    | CCCCACCTCTGAACAAATGA        | GGGTTGATAAGCTGGCTCACA     |
| SYNPO  | AGGGAGGACCTAGCAGACG         | GTCAGCTGGGCTGCAATC        |
| TOP2A  | TCTGGTCTGAAGATGATGCT        | TTAGTTAACCATTCCTTTTCGATCA |
| TAZ    | GTATCCCAGCCAAATCTCGT        | TTCTGCTGGCTCAGGGTACT      |
| YAP    | GACATCTTCTGGTCAGAGATACTTCTT | GGGGCTGTGACGTTTCATC       |

#### guide RNAs

| Region                  | fw primer                  | bw primer                 |
|-------------------------|----------------------------|---------------------------|
| cdc20_Enhancer1_sgRNA_a | CACCGGATAGCAAACCTGATTTCTGG | AAACCCAGAAATCAGTTTGCTATCC |
| cdc20_Enhancer1_sgRNA_b | CACCGGGCTGGTGCACGGATCTGCA  | AAACTGCAGATCCGTGCACCAGCCC |
| cdc20_Enhancer2_sgRNA_c | CACCGTTACCCACATTATCAATGGT  | AAACACCATTGATAATGTGGGTAAC |
| cdc20_Enhancer2_sgRNA_d | CACCGGGACGTGTAAGGGAGCTCTG  | AAACCAGAGCTCCCTTACACGTCCC |
| cdc20_Enhancer2_sgRNA_e | CACCGAGTGAGTAATCCATGGCATG  | AAACCATGCCATGGATTACTCACTC |
| sgRNA_control           | CACCGAATCTCGCTTATATAACGAG  | AAACCTCGTTATATAAGCGAGATTC |

#### siRNAs

| Gene | Name/ sequence      | Reference                      |
|------|---------------------|--------------------------------|
| ctrl | Cat#4390843         | Thermo Fisher Scientific       |
| YAP  | UCUCUGACCAGAAGAUGUC | Azzolin Cell 2014; 158:157–70. |
| TAZ  | ACGUUGACUUAGGAACUUU | Azzolin Cell 2014; 158:157–70. |

**Supplementary Table 4: Antibodies used in the study**

|                                                       |                          |                                 |
|-------------------------------------------------------|--------------------------|---------------------------------|
| Mouse monoclonal anti- $\beta$ -Actin                 | Santa Cruz Biotechnology | Cat# sc-47778; RRID: AB_626632  |
| Rabbit polyclonal anti-LIN9                           | Bethyl                   | A300-BL2981                     |
| Anti-mouse HRP conjugated                             | GE Healthcare            | Cat# NXA931; RRID: AB_772209    |
| HRP Protein A                                         | BD Biosciences           | Cat# 610438; RRID: N/A          |
| IgG from rabbit serum                                 | Sigma                    | Cat# I5006; RRID: AB_1163659    |
| IgG from mouse serum                                  | Sigma                    | Cat#I5381;RRID:AB_1163670       |
| Mouse monoclonal anti CDK7                            | Cell Signaling           | Cat#2916; RRID:AB_2077142       |
| Mouse monoclonal anti Pol II 8WG16                    | Santa Cruz Biotechnology | Cat#:sc-56767; RRID:AB_785522   |
| Mouse monoclonal anti Pol II CTD4H8 (Ser5)            | Santa Cruz Biotechnology | Cat# sc-47701; RRID:AB_677353   |
| Mouse monoclonal anti-CDC20                           | Santa Cruz Biotechnology | Cat# sc-13162; RRID: AB_628089  |
| Mouse monoclonal anti-p53 (DO-1)                      | Santa Cruz Biotechnology | Cat# sc-126; RRID:AB_628082     |
| Mouse monoclonal anti-p63 (D2K8X)                     | Cell Signaling           | Cat#: 13109; RRID:AB_2637091    |
| Mouse monoclonal anti-YAP                             | Santa Cruz Biotechnology | Cat# sc-101199;RRID: AB_1131430 |
| Rabbit polyclonal anti-YAP                            | Novus Biologicals        | NB110-58358 ; RRID:AB_922796    |
| Rabbit polyclonal anti acetyl Histone H4 (K5,8,12,16) | Merck                    | Cat#06-598 RRID:AB_310550       |
| Rabbit monoclonal anti B-MYB (phospho T487)           | Abcam                    | Cat# ab76009, RRID:AB_1309969   |
| Rabbit polyclonal anti CDK7                           | Bethyl                   | Cat# A300-405A; RRID:AB_2275973 |
| Rabbit polyclonal anti Histone H3 (K27 acetyl)        | Merck                    | Cat# 07-360; RRID: AB_310550    |
| Rabbit polyclonal anti Phospho-Chk1 (Ser345)          | Cell Signaling           | Cat#2341 ;RRID:AB_330023        |
| Rabbit polyclonal anti RNA Pol II- phospho ser2       | Abcam                    | Cat#ab5095; RRID:AB_304749      |
| Rabbit polyclonal anti RNA Pol II- phospho ser5       | Abcam                    | Cat# ab5131; RRID:AB_449369     |
| GAPDH                                                 | Cell Signaling           | Cat# 2118, RRID:AB_561053       |
| Histone H2B                                           | Abcam                    | Cat# ab1790, RRID:AB_302612     |
